# Supplementary material
Source: publisher figshare collection journal article supplement (https://karger.figshare.com/ndownloader/files/14312291)
Supplement: Supplementary file 1 [file 14312291]

**Suppl. Figure 1.** The screening fluxogram for Fabry disease patients.

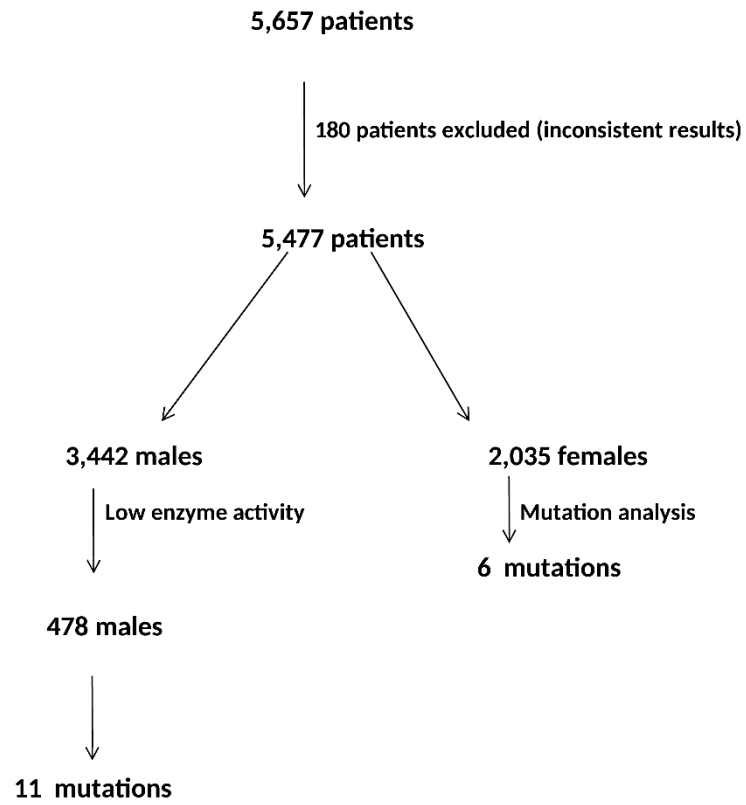

**Suppl. Table 1.** Questionnaire for patients with  $\alpha$ -Gal mutation.

|                                         |  |
|-----------------------------------------|--|
| Acroparesthesia                         |  |
| Telangiectasia,<br>angiokeratoma        |  |
| Heat,<br>exercise intolerance           |  |
| Hypo- or hyperhidrosis                  |  |
| Mouth dryness                           |  |
| Stroke history                          |  |
| Hearing impairment                      |  |
| Frequent abdominal pain,<br>diarrhea    |  |
| Left ventricular hypertrophy<br>on echo |  |
| Ophthalmological exam                   |  |
| Neurological exam                       |  |

**Suppl. Table 2.** Demographic distribution of the screened patients.

| <b>Geographical region</b> | <b>Estimated population</b> | <b>Number of screened patients (Tx/HD)</b> | <b>Number of index cases</b> |
|----------------------------|-----------------------------|--------------------------------------------|------------------------------|
| Marmara                    | 25 million                  | 3,974<br>(2,626/1,348)                     | 7                            |
| Central Anatolia           | 13 million                  | 190<br>(61/129)                            | 4                            |
| Black Sea                  | 8 million                   | 141<br>(141/0)                             | -                            |
| Aegean                     | 10 million                  | 700<br>(646/54)                            | 1                            |
| Mediterranean              | 10 million                  | 652<br>(348/304)                           | 5                            |

**Suppl. Table 3.** Low enzyme activity frequency in each center.

| <b>Centers</b>  | <b>Low enzyme activity in males (%)</b> | <b>Number of detected mutations</b> |
|-----------------|-----------------------------------------|-------------------------------------|
| 1               | 29/227 (12.7%)                          | 1                                   |
| 2               | 36/276 (13%)                            | -                                   |
| 3               | 40/421 (9.5%)                           | -                                   |
| 4               | 28/166 (16.9%)                          | -                                   |
| 5               | 14/112 (12.5%)                          | -                                   |
| 6               | 7/38 (18.4%)                            | -                                   |
| 7               | 31/192 (16.1%)                          | -                                   |
| 8               | 10/70 (14.3%)                           | -                                   |
| 9               | 4/68 (5.9%)                             | -                                   |
| 10*             | 13/36 (36.1%)                           | 4                                   |
| 11              | 0/19 (0%)                               | -                                   |
| 12              | 21/138 (15.2%)                          | -                                   |
| 13              | 18/70 (25.7%)                           |                                     |
| 14              | 11/61 (18%)                             | -                                   |
| 15              | 35/600 (5.8%)                           | 4                                   |
| 16              | 10/54 (18.5%)                           | -                                   |
| 17              | 12/70 (17.1%)                           | 2                                   |
| 18              | 60/133 (45.1%)                          | -                                   |
| 19              | 1/35 (2.9%)                             | -                                   |
| 20              | 0/24 (0%)                               | -                                   |
| 21              | 61/321 (19%)                            |                                     |
| 22              | 0/8 (0%)                                | -                                   |
| 23              | 6/47 (12.8%)                            | -                                   |
| 24 <sup>†</sup> | 102/115 (88.7%)                         | -                                   |
| 25              | 4/55 (7.3%)                             | -                                   |
| 26              | 6/36 (16.7%)                            | -                                   |
| 27              | 21/165 (12.7%)                          | -                                   |

*\*Different laboratory and threshold values were used for the patients*

*<sup>†</sup>Excluded from the study*

**Suppl. Table 4.** Clinical characteristics of the patients with D313Y mutation.

| No. | Age/Sex | Etiology           | RRT | FD signs                                         |
|-----|---------|--------------------|-----|--------------------------------------------------|
| 1   | 34/ F   | Unknown            | Tx  | -                                                |
| 2   | 31/F    | Unknown            | Tx  | -                                                |
| 3   | 69/F    | Unknown            | Tx  | -                                                |
| 4   | 39/F    | Unknown            | Tx  | -                                                |
| 5   | 33/F    | Neurogenic bladder | Tx  | -                                                |
| 6   | 43/F    | MPGN               | Tx  | -                                                |
| 7   | 68/F    | Unknown            | Tx  | -                                                |
| 8   | 34/F    | Unknown            | Tx  | -                                                |
| 9   | 45/F    | Unknown            | Tx  | -                                                |
| 10  | 36/F    | Unknown            | Tx  | -                                                |
| 11  | 53/F    | Unknown            | Tx  | -                                                |
| 12  | 53/F    | ADPKD              | Tx  | -                                                |
| 13  | 45/M    | Unknown            | Tx  | -                                                |
| 14  | 53/F    | Unknown            | PD  | Migraine-like symptoms                           |
| 15  | 58/F    | Unknown            | HD  | Acroparesthesia, heat intolerance, gut disorders |
| 16  | 56/F    | Unknown            | HD  | -                                                |
| 17  | 48/F    | Unknown            | Tx  | -                                                |
| 18  | 67/F    | Unknown            | Tx  | -                                                |
| 19  | 38/F    | Unknown            | Tx  | -                                                |

*ADPKD: autosomal dominant polycystic kidney disease, FD: Fabry disease, HD: hemodialysis, MPGN: membranoproliferative glomerulonephritis, PD: peritoneal dialysis, RRT: renal replacement therapy, Tx: transplant*

**Suppl. Table 5.** Family screening of patients with D313Y mutation.

| Index patients | Screened family members<br>(n:16)                    | Family members with mutation<br>(n: 2)     | Fabry disease signs         |
|----------------|------------------------------------------------------|--------------------------------------------|-----------------------------|
| 1              | Mother<br><br><br><br><br><br><br><br><br><br>Father | -<br><br><br><br><br><br><br><br><br><br>- | -                           |
| 2              | Sister                                               | -                                          | -                           |
| 3              | 2 daughters                                          | One daughter                               | White matter lesions on MRI |
| 4              | 2 sons                                               | -                                          | -                           |
| 5              | Sister<br><br>Daughter                               | -<br><br>-                                 | -                           |
| 6              | Son<br><br>2 brothers                                | -<br><br>-                                 | -                           |
| 7              | Sister<br><br>Brother                                | -<br><br>-                                 | -                           |
| 8              | 2 daughters                                          | -                                          | -                           |
